# Supplementary material
Source: PubMed Central journal article supplement (PMC3007141)
Supplement: JCI42580sd.pdf [file JCI42580sd.pdf]

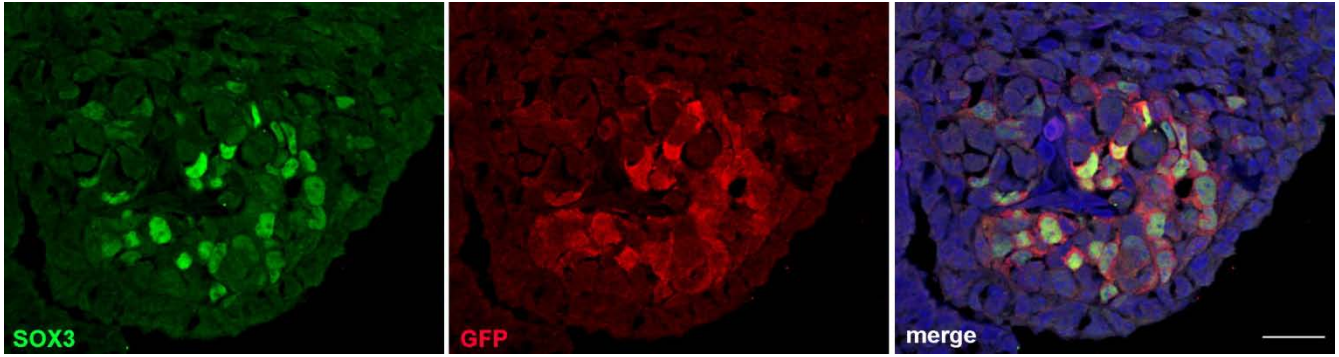

**Supplementary Figure 1. SOX3 and EGFP are coexpressed in transgenic gonads.** 2  $\mu\text{m}$  z-stack of transverse optical slices of an XX Tg/+ 17ts UGR stained with SOX3 (green) and GFP (red) antibodies. Note that SOX3 is nuclear and EGFP is expressed throughout the cell. Scale bar 25  $\mu\text{m}$ .

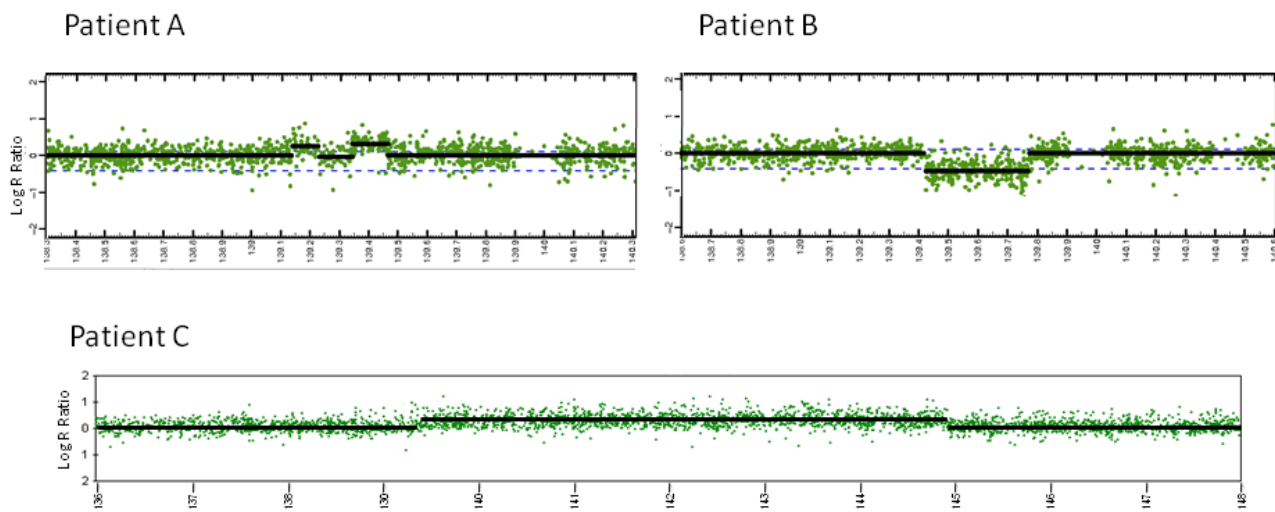

**Supplementary figure 2.** Partial microarray results for the X chromosome showing rearrangements identified in the three patients. Each green point represents a probe covering a specific genomic locus, with the y axis representing a normalised signal intensity proportional to copy number. The estimated copy number is indicated by the horizontal black lines. DNA from patient A and B was hybridized to the Affymetrix 6.0 whole genome SNP microarray and analysed with Affymetrix AROMA. DNA from patient C was hybridized to the Illumina 1M array and analysed with CNV partition v2.3.4 on Illumina Genome Studio.



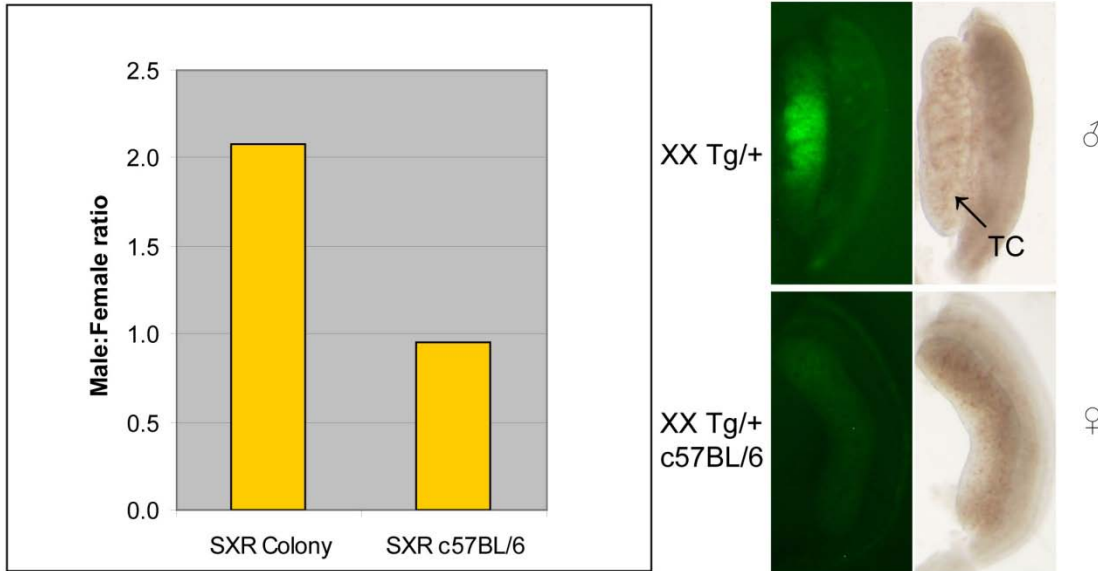

**Supplementary Figure 4. Reduced penetrance of XX male sex reversal in Sr mice correlates with increased contribution of C57BL/6 background.** (Left panel) Graph showing male:female ratio of the Sr colony maintained on a F1 (C57BL/6 x CBA) genetic background (2.1:1, n = 522) and in Tg/+ F1 males mated with C57BL/6 females (0.95:1, n = 60). (Right panel) Comparison of 13.5 dpc XX Tg/+ gonads with F1 (top) and enriched C57BL/6 genetic backgrounds (bottom). Note the diminished EGFP expression, lack of testis cords and ovarian morphology of the latter.
